# Supplementary material for: Pyrroloquinoline quinone production defines the ability of Devosia species to degrade deoxynivalenol
Source: Royal Society of Chemistry journal article supplement (doi:10.1039/d4fo00024b), 2024-01-01
Supplement: d4fo00024b1.pdf [file d4fo00024b1.pdf]

### Supplementary information

#### **Pyrroloquinoline quinone production defines the ability of the *Devosia* species to degrade Deoxynivalenol**

Chongwen Guo <sup>a,c</sup>, Jikai Wen <sup>a,c</sup>, Yu Sun <sup>a,c</sup>, Guoqiang Liang <sup>a,c</sup>, Zijiao Wang <sup>a,c</sup>, Lulu Pan <sup>a,c</sup>, Jiarun Huang <sup>a,c</sup>,  
Yuanxin Liao <sup>a,c</sup>, Zeyuan Wang <sup>a,c</sup>, Qingmei Chen <sup>a,c</sup>, Peiqiang Mu <sup>a,c,\* \* \*</sup>, Yiqun Deng <sup>a,b,\*</sup>.

a State Key Laboratory of Swine and Poultry Breeding Industry, South China Agricultural University, Guangzhou  
510642, Guangdong, P. R. China

b Guangdong Academy of Agricultural Sciences, Guangzhou 510640, Guangdong, P. R. China.

c Guangdong Provincial Key Laboratory of Protein Function and Regulation in Agricultural Organisms, College of  
Life Sciences, South China Agricultural University, Guangzhou 510642, Guangdong, P. R. China

\*Corresponding author. \*\*Corresponding author. College of Life Sciences, South China Agricultural University,  
Guangzhou 510642, Guangdong, P. R. China.

Email: [yqdeng@scau.edu.cn](mailto:yqdeng@scau.edu.cn) (Yiqun. Deng); [mpeiqliang@scau.edu.cn](mailto:mpeiqliang@scau.edu.cn) (Peiqiang Mu).

**Table S1. Accession number of genome sequences in NCBI database**

| <b>Strain</b>                                     | <b>Accession number</b> |
|---------------------------------------------------|-------------------------|
| <i>Devosia</i> sp. 17-2-E-8                       | GCF_000743515.1         |
| <i>Devosia insulae</i> strain A16                 | GCF_001402915.1         |
| <i>Devosia</i> sp. D6-9                           | GCF_014083885.1         |
| <i>Devosia aurantiaca</i> strain H239 1           | GCF_011058215.1         |
| <i>Devosia beringensis</i> strain S02             | GCF_014926585.1         |
| <i>Devosia chinhatensis</i> strain IPL18          | GCF_000969445.1         |
| <i>Devosia crocina</i> strain IPL20               | GCF_900116545.1         |
| <i>Devosia elaeis</i> strain S37 DIN_R1           | GCF_001650025.1         |
| <i>Devosia enhydra</i> strain ATCC 23634          | GCF_900119845.1         |
| <i>Devosia epidermidihirudinis</i> strain E84     | GCF_000971295.1         |
| <i>Devosia equisanguinis</i> strain CIP 111628    | GCF_900631955.1         |
| <i>Devosia faecipullorum</i> strain CC-YST69 6    | GCF_015158295.1         |
| <i>Devosia geojensis</i> strain BD-c194           | GCF_000969415.1         |
| <i>Devosia ginsengisoli</i> strain Gsoil 520      | GCF_007859655.1         |
| <i>Devosia indica</i> strain IO390501             | GCF_003056405.1         |
| <i>Devosia insulae</i> strain DS-56               | GCF_000970465.2         |
| <i>Devosia limi</i> DSM 17137                     | GCF_900128975.1         |
| <i>Devosia litorisediminis</i> strain BSSL-BM10 1 | GCF_018334155.1         |
| <i>Devosia lucknowensis</i> strain L15            | GCF_900177655.1         |
| <i>Devosia marina</i> strain L53-10-65            | GCF_009758415.1         |
| <i>Devosia naphthalenivorans</i> strain CM5-1     | GCF_003056355.1         |
| <i>Devosia neptuniae</i> strain G21611-S1         | GCF_027214225.1         |
| <i>Devosia oryziradicis</i> strain G19            | GCF_016698645.1         |
| <i>Devosia oryzisoli</i> strain PTR5              | GCF_014837245.1         |
| <i>Devosia pacifica</i> strain KCTC 32437         | GCF_014652635.1         |
| <i>Devosia psychrophila</i> strain CGMCC 1.10210  | GCF_900112505.1         |
| <i>Devosia rhizoryzae</i> strain LEGU1            | GCF_016698665.1         |
| <i>Devosia riboflavina</i> strain IFO13584        | GCF_000743575.1         |
| <i>Devosia salina</i> strain SCS-3                | GCF_019504385.1         |
| <i>Devosia sediminis</i> strain MSA67             | GCF_016411825.1         |
| <i>Devosia soli</i> strain GH2-10                 | GCF_000970455.1         |
| <i>Devosia subaequoris</i> strain DSM 23447       | GCF_014197055.1         |
| <i>Devosia submarina</i> strain JCM 18935         | GCF_003056345.1         |
| <i>Devosia ureilytica</i> strain XJ19-45          | GCF_024273205.1         |

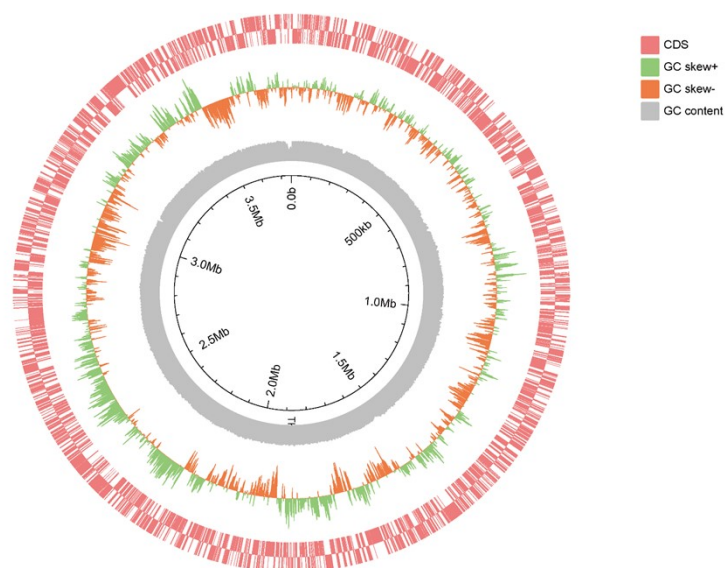

**Fig. S1.** D-G15 Genome Circular Diagram: The circular chart provides six distinct types of information, arranged from the outermost to the innermost layers. The first and second layers depict coding genes on the positive and negative DNA strands, respectively. The third and fourth layers demonstrate the GC composition across the genome. The fifth layer exhibits the GC content, while the sixth layer indicates the overall genome size.

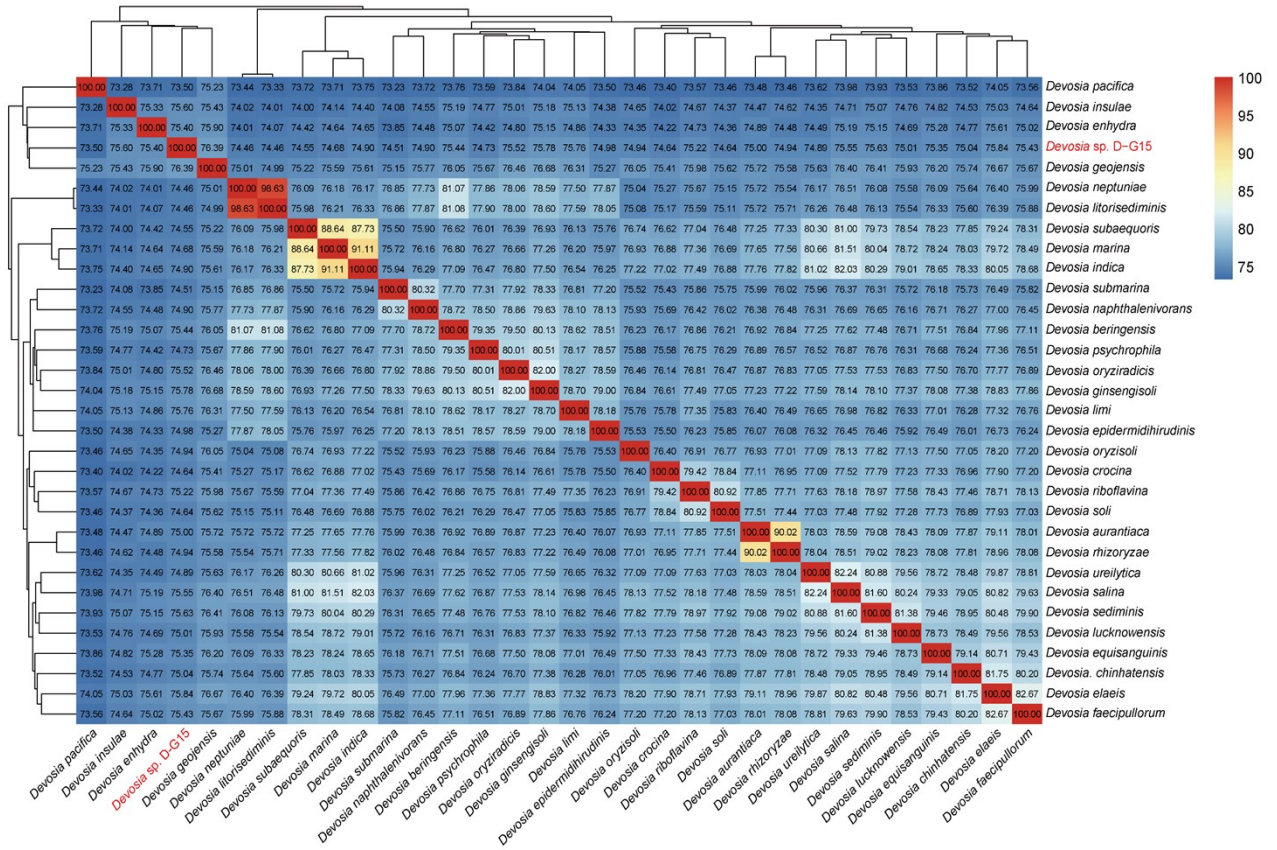

**Fig. S2.** The average nucleotide identity comparison between D-G15 and other *Devosia* strains with genome sequence in NCBI data base.

**Table S2. Mass spectrum fragmentation of DON using LC-MS/MS analysis**

| m/z      | Height  | Height % | Formula & Ion Species                                          | Loss Formula                                  | Loss Mass |
|----------|---------|----------|----------------------------------------------------------------|-----------------------------------------------|-----------|
| 249.1118 | 7098.61 | 100      | [C <sub>14</sub> H <sub>17</sub> O <sub>4</sub> ] <sup>+</sup> | CH <sub>3</sub> O <sub>2</sub>                | 47        |
| 231.1007 | 6299.14 | 88.74    | [C <sub>14</sub> H <sub>15</sub> O <sub>3</sub> ] <sup>+</sup> | CH <sub>5</sub> O                             | 65        |
| 203.1058 | 4550.01 | 64.1     | [C <sub>13</sub> H <sub>15</sub> O <sub>2</sub> ] <sup>+</sup> | C <sub>2</sub> H <sub>5</sub> O <sub>4</sub>  | 93        |
| 279.1211 | 3881.75 | 54.68    | [C <sub>15</sub> H <sub>19</sub> O <sub>5</sub> ] <sup>+</sup> | HO                                            | 17        |
| 261.111  | 2717.57 | 38.28    | [C <sub>15</sub> H <sub>17</sub> O <sub>4</sub> ] <sup>+</sup> | H <sub>3</sub> O <sub>2</sub>                 | 35        |
| 175.0756 | 2477.89 | 34.91    | [C <sub>11</sub> H <sub>11</sub> O <sub>2</sub> ] <sup>+</sup> | C <sub>4</sub> H <sub>9</sub> O <sub>4</sub>  | 121.1     |
| 219.1012 | 2154.41 | 30.35    | [C <sub>13</sub> H <sub>15</sub> O <sub>3</sub> ] <sup>+</sup> | C <sub>2</sub> H <sub>5</sub> O <sub>3</sub>  | 77        |
| 133.0856 | 1779.84 | 25.07    | [C <sub>6</sub> H <sub>13</sub> O <sub>3</sub> ] <sup>+</sup>  | C <sub>9</sub> H <sub>7</sub> O <sub>3</sub>  | 163       |
| 125.0592 | 1742.3  | 24.54    | [C <sub>7</sub> H <sub>9</sub> O <sub>2</sub> ] <sup>+</sup>   | C <sub>8</sub> H <sub>11</sub> O <sub>4</sub> | 171.1     |
| 250.1142 | 1694.9  | 23.88    | [C <sub>14</sub> H <sub>17</sub> O <sub>4</sub> ] <sup>+</sup> | CH <sub>3</sub> O <sub>2</sub>                | 47        |
| 189.0905 | 1391.11 | 19.6     | [C <sub>12</sub> H <sub>13</sub> O <sub>2</sub> ] <sup>+</sup> | C <sub>3</sub> H <sub>7</sub> O <sub>4</sub>  | 107       |
| 251.1282 | 1358.77 | 19.14    | [C <sub>14</sub> H <sub>19</sub> O <sub>4</sub> ] <sup>+</sup> | CHO <sub>2</sub>                              | 45        |
| 201.0914 | 1357.83 | 19.13    | [C <sub>13</sub> H <sub>13</sub> O <sub>2</sub> ] <sup>+</sup> | C <sub>2</sub> H <sub>7</sub> O <sub>4</sub>  | 95        |
| 137.0582 | 1278.98 | 18.02    | [C <sub>8</sub> H <sub>9</sub> O <sub>2</sub> ] <sup>+</sup>   | C <sub>7</sub> H <sub>11</sub> O <sub>4</sub> | 159.1     |
| 232.1038 | 1259.8  | 17.75    | [C <sub>14</sub> H <sub>15</sub> O <sub>3</sub> ] <sup>+</sup> | CH <sub>5</sub> O <sub>3</sub>                | 65        |
| 233.1163 | 1175.38 | 16.56    | [C <sub>14</sub> H <sub>17</sub> O <sub>3</sub> ] <sup>+</sup> | CH <sub>3</sub> O <sub>3</sub>                | 63        |
| 213.0907 | 1142.03 | 16.09    | [C <sub>14</sub> H <sub>13</sub> O <sub>2</sub> ] <sup>+</sup> | CH <sub>7</sub> O <sub>4</sub>                | 83        |
| 280.126  | 1068.66 | 15.05    | [C <sub>15</sub> H <sub>19</sub> O <sub>5</sub> ] <sup>+</sup> | HO                                            | 17        |
| 187.1135 | 1057.05 | 14.89    | [C <sub>13</sub> H <sub>15</sub> O] <sup>+</sup>               | C <sub>2</sub> H <sub>5</sub> O <sub>5</sub>  | 109       |
| 177.112  | 933.51  | 13.15    | [C <sub>8</sub> H <sub>17</sub> O <sub>4</sub> ] <sup>+</sup>  | C <sub>7</sub> H <sub>3</sub> O <sub>2</sub>  | 119       |
| 159.08   | 929.42  | 13.09    | [C <sub>11</sub> H <sub>11</sub> O] <sup>+</sup>               | C <sub>4</sub> H <sub>9</sub> O <sub>5</sub>  | 137       |
| 204.1106 | 924.31  | 13.02    | [C <sub>13</sub> H <sub>15</sub> O <sub>2</sub> ] <sup>+</sup> | C <sub>2</sub> H <sub>5</sub> O <sub>4</sub>  | 93        |
| 173.0939 | 869.08  | 12.24    | [C <sub>12</sub> H <sub>13</sub> O] <sup>+</sup>               | C <sub>3</sub> H <sub>7</sub> O <sub>5</sub>  | 123       |
| 215.1041 | 868.11  | 12.23    | [C <sub>14</sub> H <sub>15</sub> O <sub>2</sub> ] <sup>+</sup> | CH <sub>5</sub> O <sub>4</sub>                | 81        |
| 175.1096 | 837.13  | 11.79    | [C <sub>12</sub> H <sub>15</sub> O] <sup>+</sup>               | C <sub>3</sub> H <sub>5</sub> O <sub>5</sub>  | 121       |
| 267.1194 | 802.51  | 11.31    | [C <sub>14</sub> H <sub>19</sub> O <sub>5</sub> ] <sup>+</sup> | CHO                                           | 29        |
| 161.0944 | 756.75  | 10.66    | [C <sub>11</sub> H <sub>13</sub> O] <sup>+</sup>               | C <sub>4</sub> H <sub>7</sub> O <sub>5</sub>  | 135       |
| 185.0953 | 735.73  | 10.36    | [C <sub>13</sub> H <sub>13</sub> O] <sup>+</sup>               | C <sub>2</sub> H <sub>7</sub> O <sub>5</sub>  | 111       |
| 229.0695 | 725.79  | 10.22    | [C <sub>10</sub> H <sub>13</sub> O <sub>6</sub> ] <sup>+</sup> | C <sub>5</sub> H <sub>7</sub>                 | 67.1      |
| 177.0898 | 700.76  | 9.87     | [C <sub>11</sub> H <sub>13</sub> O <sub>2</sub> ] <sup>+</sup> | C <sub>4</sub> H <sub>7</sub> O <sub>4</sub>  | 119       |
| 243.1034 | 533.56  | 7.52     | [C <sub>15</sub> H <sub>15</sub> O <sub>3</sub> ] <sup>+</sup> | H <sub>5</sub> O <sub>3</sub>                 | 53        |
| 109.0646 | 506.66  | 7.14     | [C <sub>7</sub> H <sub>9</sub> O] <sup>+</sup>                 | C <sub>8</sub> H <sub>11</sub> O <sub>5</sub> | 187.1     |
| 262.1151 | 501.89  | 7.07     | [C <sub>15</sub> H <sub>17</sub> O <sub>4</sub> ] <sup>+</sup> | H <sub>3</sub> O <sub>2</sub>                 | 35        |
| 121.0641 | 499.06  | 7.03     | [C <sub>8</sub> H <sub>9</sub> O] <sup>+</sup>                 | C <sub>7</sub> H <sub>11</sub> O <sub>5</sub> | 175.1     |
| 165.0892 | 481.51  | 6.78     | [C <sub>10</sub> H <sub>13</sub> O <sub>2</sub> ] <sup>+</sup> | C <sub>5</sub> H <sub>7</sub> O <sub>4</sub>  | 131       |
| 161.0598 | 466.11  | 6.57     | [C <sub>10</sub> H <sub>9</sub> O <sub>2</sub> ] <sup>+</sup>  | C <sub>5</sub> H <sub>11</sub> O <sub>4</sub> | 135.1     |
| 105.0703 | 421.46  | 5.94     | [C <sub>8</sub> H <sub>9</sub> ] <sup>+</sup>                  | C <sub>7</sub> H <sub>11</sub> O <sub>6</sub> | 191.1     |
| 163.0732 | 412.49  | 5.81     | [C <sub>10</sub> H <sub>11</sub> O <sub>2</sub> ] <sup>+</sup> | C <sub>5</sub> H <sub>9</sub> O <sub>4</sub>  | 133.1     |
| 205.0828 | 406.22  | 5.72     | [C <sub>12</sub> H <sub>13</sub> O <sub>3</sub> ] <sup>+</sup> | C <sub>3</sub> H <sub>7</sub> O <sub>3</sub>  | 91        |
| 176.0758 | 405.52  | 5.71     | [C <sub>11</sub> H <sub>11</sub> O <sub>2</sub> ] <sup>+</sup> | C <sub>4</sub> H <sub>9</sub> O <sub>4</sub>  | 121.1     |
| 197.0963 | 403.17  | 5.68     | [C <sub>14</sub> H <sub>13</sub> O] <sup>+</sup>               | CH <sub>7</sub> O <sub>5</sub>                | 99        |
| 231.1443 | 386.71  | 5.45     | [C <sub>15</sub> H <sub>19</sub> O <sub>2</sub> ] <sup>+</sup> | HO <sub>4</sub>                               | 65        |

|          |        |      |                                                                |                                               |       |
|----------|--------|------|----------------------------------------------------------------|-----------------------------------------------|-------|
| 149.0956 | 382.17 | 5.38 | [C <sub>10</sub> H <sub>13</sub> O] <sup>+</sup>               | C <sub>5</sub> H <sub>7</sub> O <sub>5</sub>  | 147   |
| 159.1184 | 372.88 | 5.25 | [C <sub>12</sub> H <sub>15</sub> ] <sup>+</sup>                | C <sub>3</sub> H <sub>5</sub> O <sub>6</sub>  | 137   |
| 145.1009 | 358.28 | 5.05 | [C <sub>11</sub> H <sub>13</sub> ] <sup>+</sup>                | C <sub>4</sub> H <sub>7</sub> O <sub>6</sub>  | 151   |
| 203.0703 | 355.24 | 5    | [C <sub>12</sub> H <sub>11</sub> O <sub>3</sub> ] <sup>+</sup> | C <sub>3</sub> H <sub>9</sub> O <sub>3</sub>  | 93.1  |
| 123.0434 | 341.25 | 4.81 | [C <sub>7</sub> H <sub>7</sub> O <sub>2</sub> ] <sup>+</sup>   | C <sub>8</sub> H <sub>13</sub> O <sub>4</sub> | 173.1 |
| 191.1062 | 321.87 | 4.53 | [C <sub>12</sub> H <sub>15</sub> O <sub>2</sub> ] <sup>+</sup> | C <sub>3</sub> H <sub>5</sub> O <sub>4</sub>  | 105   |
| 252.131  | 291.32 | 4.1  | [C <sub>14</sub> H <sub>19</sub> O <sub>4</sub> ] <sup>+</sup> | CHO <sub>2</sub>                              | 45    |
| 220.1049 | 275.16 | 3.88 | [C <sub>13</sub> H <sub>15</sub> O <sub>3</sub> ] <sup>+</sup> | C <sub>2</sub> H <sub>5</sub> O <sub>3</sub>  | 77    |
| 135.0793 | 274.51 | 3.87 | [C <sub>9</sub> H <sub>11</sub> O] <sup>+</sup>                | C <sub>6</sub> H <sub>9</sub> O <sub>5</sub>  | 161   |
| 221.1191 | 258.71 | 3.64 | [C <sub>13</sub> H <sub>17</sub> O <sub>3</sub> ] <sup>+</sup> | C <sub>2</sub> H <sub>3</sub> O <sub>3</sub>  | 75    |
| 107.0504 | 256.41 | 3.61 | [C <sub>7</sub> H <sub>7</sub> O] <sup>+</sup>                 | C <sub>8</sub> H <sub>13</sub> O <sub>5</sub> | 189.1 |
| 142.0774 | 250.53 | 3.53 | [C <sub>11</sub> H <sub>10</sub> ] <sup>+</sup>                | C <sub>4</sub> H <sub>10</sub> O <sub>6</sub> | 154   |
| 157.1007 | 247.69 | 3.49 | [C <sub>12</sub> H <sub>13</sub> ] <sup>+</sup>                | C <sub>3</sub> H <sub>7</sub> O <sub>6</sub>  | 139   |
| 129.0687 | 246.5  | 3.47 | [C <sub>10</sub> H <sub>9</sub> ] <sup>+</sup>                 | C <sub>5</sub> H <sub>11</sub> O <sub>6</sub> | 167.1 |
| 190.0939 | 242.57 | 3.42 | [C <sub>12</sub> H <sub>13</sub> O <sub>2</sub> ] <sup>+</sup> | C <sub>3</sub> H <sub>7</sub> O <sub>4</sub>  | 107   |
| 169.1009 | 224.07 | 3.16 | [C <sub>13</sub> H <sub>13</sub> ] <sup>+</sup>                | C <sub>2</sub> H <sub>7</sub> O <sub>6</sub>  | 127   |
| 145.0633 | 216.46 | 3.05 | [C <sub>10</sub> H <sub>9</sub> O] <sup>+</sup>                | C <sub>5</sub> H <sub>11</sub> O <sub>5</sub> | 151.1 |
| 183.0807 | 216.17 | 3.05 | [C <sub>13</sub> H <sub>11</sub> O] <sup>+</sup>               | C <sub>2</sub> H <sub>9</sub> O <sub>5</sub>  | 113   |
| 126.065  | 212.74 | 3    | [C <sub>7</sub> H <sub>9</sub> O <sub>2</sub> ] <sup>+</sup>   | C <sub>8</sub> H <sub>11</sub> O <sub>4</sub> | 171.1 |
| 205.1205 | 213.01 | 3    | [C <sub>13</sub> H <sub>17</sub> O <sub>2</sub> ] <sup>+</sup> | C <sub>2</sub> H <sub>3</sub> O <sub>4</sub>  | 91    |
| 123.0806 | 211.5  | 2.98 | [C <sub>8</sub> H <sub>11</sub> O] <sup>+</sup>                | C <sub>7</sub> H <sub>9</sub> O <sub>5</sub>  | 173   |
| 119.0855 | 204.28 | 2.88 | [C <sub>9</sub> H <sub>11</sub> ] <sup>+</sup>                 | C <sub>6</sub> H <sub>9</sub> O <sub>6</sub>  | 177   |
| 131.0873 | 202.11 | 2.85 | [C <sub>10</sub> H <sub>11</sub> ] <sup>+</sup>                | C <sub>5</sub> H <sub>9</sub> O <sub>6</sub>  | 165   |
| 151.0758 | 189.99 | 2.68 | [C <sub>9</sub> H <sub>11</sub> O <sub>2</sub> ] <sup>+</sup>  | C <sub>6</sub> H <sub>9</sub> O <sub>4</sub>  | 145.1 |
| 162.0689 | 186.3  | 2.62 | [C <sub>10</sub> H <sub>10</sub> O <sub>2</sub> ] <sup>+</sup> | C <sub>5</sub> H <sub>10</sub> O <sub>4</sub> | 134.1 |
| 177.0522 | 185.25 | 2.61 | [C <sub>10</sub> H <sub>9</sub> O <sub>3</sub> ] <sup>+</sup>  | C <sub>5</sub> H <sub>11</sub> O <sub>3</sub> | 119.1 |
| 109.0274 | 184.79 | 2.6  | [C <sub>6</sub> H <sub>5</sub> O <sub>2</sub> ] <sup>+</sup>   | C <sub>9</sub> H <sub>15</sub> O <sub>4</sub> | 187.1 |
| 187.0746 | 182.51 | 2.57 | [C <sub>12</sub> H <sub>11</sub> O <sub>2</sub> ] <sup>+</sup> | C <sub>3</sub> H <sub>9</sub> O <sub>4</sub>  | 109.1 |
| 113.058  | 177.43 | 2.5  | [C <sub>6</sub> H <sub>9</sub> O <sub>2</sub> ] <sup>+</sup>   | C <sub>9</sub> H <sub>11</sub> O <sub>4</sub> | 183.1 |
| 147.0801 | 176.97 | 2.49 | [C <sub>10</sub> H <sub>11</sub> O] <sup>+</sup>               | C <sub>5</sub> H <sub>9</sub> O <sub>5</sub>  | 149   |
| 234.1192 | 177.03 | 2.49 | [C <sub>14</sub> H <sub>17</sub> O <sub>3</sub> ] <sup>+</sup> | CH <sub>3</sub> O <sub>3</sub>                | 63    |
| 149.0591 | 175.85 | 2.48 | [C <sub>9</sub> H <sub>9</sub> O <sub>2</sub> ] <sup>+</sup>   | C <sub>6</sub> H <sub>11</sub> O <sub>4</sub> | 147.1 |

**Table S3. Mass spectrum fragmentation of Compound A using LC-MS/MS analysis**

| m/z      | Height  | Height % | Formula & Ion Species                                          | Loss Formula                                  | Loss Mass |
|----------|---------|----------|----------------------------------------------------------------|-----------------------------------------------|-----------|
| 205.0856 | 3642    | 100.00   | [C <sub>12</sub> H <sub>13</sub> O <sub>3</sub> ] <sup>+</sup> | C <sub>3</sub> H <sub>5</sub> O <sub>3</sub>  | 89        |
| 247.0957 | 1329.32 | 36.50    | [C <sub>14</sub> H <sub>15</sub> O <sub>4</sub> ] <sup>+</sup> | CH <sub>3</sub> O <sub>2</sub>                | 47        |
| 187.0753 | 878.15  | 24.11    | [C <sub>12</sub> H <sub>11</sub> O <sub>2</sub> ] <sup>+</sup> | C <sub>3</sub> H <sub>7</sub> O <sub>4</sub>  | 107       |
| 201.0889 | 733.27  | 20.13    | [C <sub>13</sub> H <sub>13</sub> O <sub>2</sub> ] <sup>+</sup> | C <sub>2</sub> H <sub>5</sub> O <sub>4</sub>  | 93        |
| 277.1062 | 661.08  | 18.15    | [C <sub>15</sub> H <sub>17</sub> O <sub>5</sub> ] <sup>+</sup> | HO                                            | 17        |
| 229.0851 | 581.93  | 15.98    | [C <sub>14</sub> H <sub>13</sub> O <sub>3</sub> ] <sup>+</sup> | CH <sub>5</sub> O <sub>3</sub>                | 65        |
| 206.0891 | 511.14  | 14.03    | [C <sub>12</sub> H <sub>13</sub> O <sub>3</sub> ] <sup>+</sup> | C <sub>3</sub> H <sub>5</sub> O <sub>3</sub>  | 89        |
| 107.9658 | 459.8   | 12.62    | [C O <sub>6</sub> ] <sup>+</sup>                               | C <sub>14</sub> H <sub>18</sub>               | 186.1     |
| 137.059  | 397.97  | 10.93    | [C <sub>8</sub> H <sub>9</sub> O <sub>2</sub> ] <sup>+</sup>   | C <sub>7</sub> H <sub>9</sub> O <sub>4</sub>  | 157.1     |
| 248.097  | 362.22  | 9.95     | [C <sub>14</sub> H <sub>15</sub> O <sub>4</sub> ] <sup>+</sup> | CH <sub>3</sub> O <sub>2</sub>                | 47        |
| 219.0997 | 342.81  | 9.41     | [C <sub>13</sub> H <sub>15</sub> O <sub>3</sub> ] <sup>+</sup> | C <sub>2</sub> H <sub>3</sub> O <sub>3</sub>  | 75        |
| 125.0585 | 319.92  | 8.78     | [C <sub>7</sub> H <sub>9</sub> O <sub>2</sub> ] <sup>+</sup>   | C <sub>8</sub> H <sub>9</sub> O <sub>4</sub>  | 169.1     |
| 217.0861 | 272.15  | 7.47     | [C <sub>13</sub> H <sub>13</sub> O <sub>3</sub> ] <sup>+</sup> | C <sub>2</sub> H <sub>5</sub> O <sub>3</sub>  | 77        |
| 173.0962 | 229.63  | 6.31     | [C <sub>12</sub> H <sub>13</sub> O] <sup>+</sup>               | C <sub>3</sub> H <sub>5</sub> O <sub>5</sub>  | 121       |
| 189.0895 | 229.61  | 6.30     | [C <sub>12</sub> H <sub>13</sub> O <sub>2</sub> ] <sup>+</sup> | C <sub>3</sub> H <sub>5</sub> O <sub>4</sub>  | 105       |
| 203.1034 | 225.66  | 6.20     | [C <sub>13</sub> H <sub>15</sub> O <sub>2</sub> ] <sup>+</sup> | C <sub>2</sub> H <sub>3</sub> O <sub>4</sub>  | 91        |
| 222.1187 | 224.6   | 6.17     | [C <sub>13</sub> H <sub>18</sub> O <sub>3</sub> ] <sup>+</sup> | C <sub>2</sub> O <sub>3</sub>                 | 72        |
| 175.075  | 218.39  | 6.00     | [C <sub>11</sub> H <sub>11</sub> O <sub>2</sub> ] <sup>+</sup> | C <sub>4</sub> H <sub>7</sub> O <sub>4</sub>  | 119       |
| 221.1153 | 199.18  | 5.47     | [C <sub>13</sub> H <sub>17</sub> O <sub>3</sub> ] <sup>+</sup> | C <sub>2</sub> HO <sub>3</sub>                | 73        |
| 265.108  | 192.15  | 5.28     | [C <sub>14</sub> H <sub>17</sub> O <sub>5</sub> ] <sup>+</sup> | CHO                                           | 29        |
| 249.1081 | 185.59  | 5.10     | [C <sub>14</sub> H <sub>17</sub> O <sub>4</sub> ] <sup>+</sup> | CHO <sub>2</sub>                              | 45        |
| 153.0566 | 182.16  | 5.00     | [C <sub>8</sub> H <sub>9</sub> O <sub>3</sub> ] <sup>+</sup>   | C <sub>7</sub> H <sub>9</sub> O <sub>3</sub>  | 141.1     |
| 231.1023 | 180.1   | 4.95     | [C <sub>14</sub> H <sub>15</sub> O <sub>3</sub> ] <sup>+</sup> | CH <sub>3</sub> O <sub>3</sub>                | 63        |
| 259.097  | 172.38  | 4.73     | [C <sub>15</sub> H <sub>15</sub> O <sub>4</sub> ] <sup>+</sup> | H <sub>3</sub> O <sub>2</sub>                 | 35        |
| 188.0786 | 166.54  | 4.57     | [C <sub>12</sub> H <sub>11</sub> O <sub>2</sub> ] <sup>+</sup> | C <sub>3</sub> H <sub>7</sub> O <sub>4</sub>  | 107       |
| 230.0913 | 134.47  | 3.69     | [C <sub>14</sub> H <sub>13</sub> O <sub>3</sub> ] <sup>+</sup> | CH <sub>5</sub> O <sub>3</sub>                | 65        |
| 109.0645 | 133.06  | 3.65     | [C <sub>13</sub> H <sub>15</sub> O <sub>4</sub> ] <sup>+</sup> | C <sub>2</sub> H <sub>3</sub> O <sub>2</sub>  | 59        |
| 235.0936 | 132.96  | 3.65     | [C <sub>7</sub> H <sub>9</sub> O] <sup>+</sup>                 | C <sub>8</sub> H <sub>9</sub> O <sub>5</sub>  | 185       |
| 191.0719 | 123.44  | 3.39     | [C <sub>11</sub> H <sub>11</sub> O <sub>3</sub> ] <sup>+</sup> | C <sub>4</sub> H <sub>7</sub> O <sub>3</sub>  | 103       |
| 175.112  | 117.76  | 3.23     | [C <sub>12</sub> H <sub>15</sub> O] <sup>+</sup>               | C <sub>3</sub> H <sub>3</sub> O <sub>5</sub>  | 119       |
| 278.107  | 115.28  | 3.17     | [C <sub>15</sub> H <sub>17</sub> O <sub>5</sub> ] <sup>+</sup> | HO                                            | 17        |
| 257.1013 | 103.19  | 2.83     | [C <sub>12</sub> H <sub>17</sub> O <sub>6</sub> ] <sup>+</sup> | C <sub>3</sub> H                              | 37        |
| 159.0813 | 100.37  | 2.76     | [C <sub>11</sub> H <sub>11</sub> O] <sup>+</sup>               | C <sub>4</sub> H <sub>7</sub> O <sub>5</sub>  | 135       |
| 213.0902 | 97.29   | 2.67     | [C <sub>14</sub> H <sub>13</sub> O <sub>2</sub> ] <sup>+</sup> | CH <sub>5</sub> O <sub>4</sub>                | 81        |
| 255.0235 | 96.78   | 2.66     | [C <sub>14</sub> H <sub>7</sub> O <sub>5</sub> ] <sup>+</sup>  | CH <sub>11</sub> O                            | 39.1      |
| 237.1147 | 95.86   | 2.63     | [C <sub>13</sub> H <sub>17</sub> O <sub>4</sub> ] <sup>+</sup> | C <sub>2</sub> HO <sub>2</sub>                | 57        |
| 123.0445 | 92.53   | 2.54     | [C <sub>9</sub> H <sub>11</sub> O <sub>2</sub> ] <sup>+</sup>  | C <sub>6</sub> H <sub>7</sub> O <sub>4</sub>  | 143       |
| 151.0734 | 92.44   | 2.54     | [C <sub>7</sub> H <sub>7</sub> O <sub>2</sub> ] <sup>+</sup>   | C <sub>8</sub> H <sub>11</sub> O <sub>4</sub> | 171.1     |
| 185.0982 | 89.15   | 2.45     | [C <sub>13</sub> H <sub>13</sub> O] <sup>+</sup>               | C <sub>2</sub> H <sub>5</sub> O <sub>5</sub>  | 109       |
| 204.1143 | 81.11   | 2.23     | [C <sub>13</sub> H <sub>16</sub> O <sub>2</sub> ] <sup>+</sup> | C <sub>2</sub> H <sub>2</sub> O <sub>4</sub>  | 90        |
| 165.0912 | 77.02   | 2.11     | [C <sub>10</sub> H <sub>13</sub> O <sub>2</sub> ] <sup>+</sup> | C <sub>5</sub> H <sub>5</sub> O <sub>4</sub>  | 129       |
| 201.1298 | 76.21   | 2.09     | [C <sub>14</sub> H <sub>17</sub> O] <sup>+</sup>               | CHO <sub>5</sub>                              | 93        |

---

|          |       |      |                                                                |                                              |     |
|----------|-------|------|----------------------------------------------------------------|----------------------------------------------|-----|
| 163.0738 | 72.88 | 2.00 | [C <sub>10</sub> H <sub>11</sub> O <sub>2</sub> ] <sup>+</sup> | C <sub>5</sub> H <sub>7</sub> O <sub>4</sub> | 131 |
| 126.0653 | 67.06 | 1.84 | [C <sub>7</sub> H <sub>10</sub> O <sub>2</sub> ] <sup>+</sup>  | C <sub>8</sub> H <sub>8</sub> O <sub>4</sub> | 168 |
| 263.095  | 60.48 | 1.66 | [C <sub>14</sub> H <sub>15</sub> O <sub>5</sub> ] <sup>+</sup> | CH <sub>3</sub> O                            | 31  |
| 210.1081 | 58.06 | 1.59 | [C <sub>8</sub> H <sub>18</sub> O <sub>6</sub> ] <sup>+</sup>  | C <sub>7</sub>                               | 84  |

---



**Table S4. Mass spectrum fragmentation of Compound B using LC-MS/MS analysis**

| m/z      | Height  | Height % | Formula & Ion Species                                          | Loss Formula                                  | Loss Mass |
|----------|---------|----------|----------------------------------------------------------------|-----------------------------------------------|-----------|
| 279.1222 | 4683.68 | 100      | [C <sub>15</sub> H <sub>19</sub> O <sub>5</sub> ] <sup>+</sup> | HO                                            | 17        |
| 231.1015 | 4126.91 | 88.11    | [C <sub>14</sub> H <sub>15</sub> O <sub>3</sub> ] <sup>+</sup> | CH <sub>5</sub> O <sub>3</sub>                | 65        |
| 175.0736 | 1944.28 | 41.51    | [C <sub>11</sub> H <sub>11</sub> O <sub>2</sub> ] <sup>+</sup> | C <sub>4</sub> H <sub>9</sub> O <sub>4</sub>  | 121.1     |
| 249.1097 | 1046.59 | 22.35    | [C <sub>14</sub> H <sub>17</sub> O <sub>4</sub> ] <sup>+</sup> | CH <sub>3</sub> O <sub>2</sub>                | 47        |
| 213.0897 | 953.23  | 20.35    | [C <sub>14</sub> H <sub>13</sub> O <sub>2</sub> ] <sup>+</sup> | CH <sub>7</sub> O <sub>4</sub>                | 83        |
| 280.1254 | 937.41  | 20.01    | [C <sub>15</sub> H <sub>19</sub> O <sub>5</sub> ] <sup>+</sup> | HO                                            | 17        |
| 203.1067 | 840.7   | 17.95    | [C <sub>13</sub> H <sub>15</sub> O <sub>2</sub> ] <sup>+</sup> | C <sub>2</sub> H <sub>5</sub> O <sub>4</sub>  | 93        |
| 177.0909 | 806.88  | 17.23    | [C <sub>11</sub> H <sub>13</sub> O <sub>2</sub> ] <sup>+</sup> | C <sub>4</sub> H <sub>7</sub> O <sub>4</sub>  | 119       |
| 232.1053 | 671.23  | 14.33    | [C <sub>14</sub> H <sub>15</sub> O <sub>3</sub> ] <sup>+</sup> | CH <sub>5</sub> O <sub>3</sub>                | 65        |
| 219.1029 | 590.28  | 12.6     | [C <sub>13</sub> H <sub>15</sub> O <sub>3</sub> ] <sup>+</sup> | C <sub>2</sub> H <sub>5</sub> O <sub>3</sub>  | 77        |
| 261.1132 | 587.25  | 12.54    | [C <sub>15</sub> H <sub>17</sub> O <sub>4</sub> ] <sup>+</sup> | H <sub>3</sub> O <sub>2</sub>                 | 35        |
| 201.0906 | 511.18  | 10.91    | [C <sub>13</sub> H <sub>13</sub> O <sub>2</sub> ] <sup>+</sup> | C <sub>2</sub> H <sub>7</sub> O <sub>4</sub>  | 95        |
| 205.0843 | 484.55  | 10.35    | [C <sub>12</sub> H <sub>13</sub> O <sub>3</sub> ] <sup>+</sup> | C <sub>3</sub> H <sub>7</sub> O <sub>3</sub>  | 91        |
| 189.0915 | 484.52  | 10.34    | [C <sub>12</sub> H <sub>13</sub> O <sub>2</sub> ] <sup>+</sup> | C <sub>3</sub> H <sub>7</sub> O <sub>4</sub>  | 107       |
| 215.1087 | 364.74  | 7.79     | [C <sub>14</sub> H <sub>15</sub> O <sub>2</sub> ] <sup>+</sup> | CH <sub>5</sub> O <sub>4</sub>                | 81        |
| 151.0758 | 316.09  | 6.75     | [C <sub>9</sub> H <sub>11</sub> O <sub>2</sub> ] <sup>+</sup>  | C <sub>6</sub> H <sub>9</sub> O <sub>4</sub>  | 145.1     |
| 125.0602 | 313.61  | 6.7      | [C <sub>7</sub> H <sub>9</sub> O <sub>2</sub> ] <sup>+</sup>   | C <sub>8</sub> H <sub>11</sub> O <sub>4</sub> | 171.1     |
| 137.0578 | 298.11  | 6.36     | [C <sub>8</sub> H <sub>9</sub> O <sub>2</sub> ] <sup>+</sup>   | C <sub>7</sub> H <sub>11</sub> O <sub>4</sub> | 159.1     |
| 173.0953 | 276.86  | 5.91     | [C <sub>12</sub> H <sub>13</sub> O] <sup>+</sup>               | C <sub>3</sub> H <sub>7</sub> O <sub>5</sub>  | 123       |
| 201.1231 | 274.1   | 5.85     | [C <sub>14</sub> H <sub>17</sub> O] <sup>+</sup>               | CH <sub>3</sub> O <sub>5</sub>                | 95        |
| 231.1367 | 271.83  | 5.8      | [C <sub>15</sub> H <sub>19</sub> O <sub>2</sub> ] <sup>+</sup> | HO <sub>4</sub>                               | 65        |
| 185.0949 | 270.47  | 5.77     | [C <sub>13</sub> H <sub>13</sub> O] <sup>+</sup>               | C <sub>2</sub> H <sub>7</sub> O <sub>5</sub>  | 111       |
| 233.1139 | 267.16  | 5.7      | [C <sub>14</sub> H <sub>17</sub> O <sub>3</sub> ] <sup>+</sup> | CH <sub>3</sub> O <sub>3</sub>                | 63        |
| 251.1278 | 226.08  | 4.83     | [C <sub>14</sub> H <sub>19</sub> O <sub>4</sub> ] <sup>+</sup> | CHO <sub>2</sub>                              | 45        |
| 207.1003 | 185.48  | 3.96     | [C <sub>12</sub> H <sub>15</sub> O <sub>3</sub> ] <sup>+</sup> | C <sub>3</sub> H <sub>5</sub> O <sub>3</sub>  | 89        |
| 175.1086 | 171.78  | 3.67     | [C <sub>12</sub> H <sub>15</sub> O] <sup>+</sup>               | C <sub>3</sub> H <sub>5</sub> O <sub>5</sub>  | 121       |
| 243.0996 | 165.14  | 3.53     | [C <sub>15</sub> H <sub>15</sub> O <sub>3</sub> ] <sup>+</sup> | H <sub>5</sub> O <sub>3</sub>                 | 53        |
| 171.0801 | 154.84  | 3.31     | [C <sub>12</sub> H <sub>11</sub> O] <sup>+</sup>               | C <sub>3</sub> H <sub>9</sub> O <sub>5</sub>  | 125       |
| 220.104  | 145.17  | 3.1      | [C <sub>13</sub> H <sub>15</sub> O <sub>3</sub> ] <sup>+</sup> | C <sub>2</sub> H <sub>5</sub> O <sub>3</sub>  | 77        |
| 163.0744 | 143.37  | 3.06     | [C <sub>10</sub> H <sub>11</sub> O <sub>2</sub> ] <sup>+</sup> | C <sub>5</sub> H <sub>9</sub> O <sub>4</sub>  | 133.1     |
| 193.0868 | 141.72  | 3.03     | [C <sub>11</sub> H <sub>13</sub> O <sub>3</sub> ] <sup>+</sup> | C <sub>4</sub> H <sub>7</sub> O <sub>3</sub>  | 103       |
| 151.0395 | 137.14  | 2.93     | [C <sub>8</sub> H <sub>7</sub> O <sub>3</sub> ] <sup>+</sup>   | C <sub>7</sub> H <sub>13</sub> O <sub>3</sub> | 145.1     |
| 127.0777 | 136.82  | 2.92     | [C <sub>7</sub> H <sub>11</sub> O <sub>2</sub> ] <sup>+</sup>  | C <sub>8</sub> H <sub>9</sub> O <sub>4</sub>  | 169.1     |
| 159.0824 | 130.41  | 2.78     | [C <sub>11</sub> H <sub>11</sub> O] <sup>+</sup>               | C <sub>4</sub> H <sub>9</sub> O <sub>5</sub>  | 137       |
| 153.0541 | 120.28  | 2.57     | [C <sub>8</sub> H <sub>9</sub> O <sub>3</sub> ] <sup>+</sup>   | C <sub>7</sub> H <sub>11</sub> O <sub>3</sub> | 143.1     |
| 173.131  | 110.16  | 2.35     | [C <sub>13</sub> H <sub>17</sub> ] <sup>+</sup>                | C <sub>2</sub> H <sub>3</sub> O <sub>6</sub>  | 123       |
| 191.1032 | 104.68  | 2.23     | [C <sub>12</sub> H <sub>15</sub> O <sub>2</sub> ] <sup>+</sup> | C <sub>3</sub> H <sub>5</sub> O <sub>4</sub>  | 105       |
| 205.1196 | 102.3   | 2.18     | [C <sub>13</sub> H <sub>17</sub> O <sub>2</sub> ] <sup>+</sup> | C <sub>2</sub> H <sub>3</sub> O <sub>4</sub>  | 91        |
| 178.0948 | 95.16   | 2.03     | [C <sub>11</sub> H <sub>13</sub> O <sub>2</sub> ] <sup>+</sup> | C <sub>4</sub> H <sub>7</sub> O <sub>4</sub>  | 119       |
| 107.0496 | 93.64   | 2        | [C <sub>7</sub> H <sub>7</sub> O] <sup>+</sup>                 | C <sub>8</sub> H <sub>13</sub> O <sub>5</sub> | 189.1     |
| 216.1091 | 92.91   | 1.98     | [C <sub>14</sub> H <sub>15</sub> O <sub>2</sub> ] <sup>+</sup> | CH <sub>5</sub> O <sub>4</sub>                | 81        |
| 225.0892 | 83.17   | 1.78     | [C <sub>15</sub> H <sub>13</sub> O <sub>2</sub> ] <sup>+</sup> | H <sub>7</sub> O <sub>4</sub>                 | 71        |

---

|          |       |      |                                                                |                                               |       |
|----------|-------|------|----------------------------------------------------------------|-----------------------------------------------|-------|
| 202.0955 | 80.69 | 1.72 | [C <sub>13</sub> H <sub>13</sub> O <sub>2</sub> ] <sup>+</sup> | C <sub>2</sub> H <sub>7</sub> O <sub>4</sub>  | 95    |
| 234.1191 | 79.96 | 1.71 | [C <sub>14</sub> H <sub>17</sub> O <sub>3</sub> ] <sup>+</sup> | CH <sub>3</sub> O <sub>3</sub>                | 63    |
| 133.0982 | 79.8  | 1.7  | [C <sub>10</sub> H <sub>13</sub> ] <sup>+</sup>                | C <sub>5</sub> H <sub>7</sub> O <sub>6</sub>  | 163   |
| 197.0977 | 71.2  | 1.52 | [C <sub>14</sub> H <sub>13</sub> O] <sup>+</sup>               | CH <sub>7</sub> O <sub>5</sub>                | 99    |
| 203.0681 | 70.03 | 1.5  | [C <sub>12</sub> H <sub>11</sub> O <sub>3</sub> ] <sup>+</sup> | C <sub>3</sub> H <sub>9</sub> O <sub>3</sub>  | 93.1  |
| 165.055  | 65.81 | 1.41 | [C <sub>9</sub> H <sub>9</sub> O <sub>3</sub> ] <sup>+</sup>   | C <sub>6</sub> H <sub>11</sub> O <sub>3</sub> | 131.1 |
| 111.0455 | 63.8  | 1.36 | [C <sub>6</sub> H <sub>7</sub> O <sub>2</sub> ] <sup>+</sup>   | C <sub>9</sub> H <sub>13</sub> O <sub>4</sub> | 185.1 |

---

**Table S5. Mass spectrum fragmentation of Compound C using LC-MS/MS analysis**

| m/z      | Height  | Height % | Formula & Ion Species                                          | Loss Formula                                  | Loss Mass |
|----------|---------|----------|----------------------------------------------------------------|-----------------------------------------------|-----------|
| 217.0847 | 1451.92 | 100      | [C <sub>13</sub> H <sub>13</sub> O <sub>3</sub> ] <sup>+</sup> | C <sub>2</sub> H <sub>5</sub> O <sub>4</sub>  | 93        |
| 293.1015 | 1345.52 | 92.67    | [C <sub>15</sub> H <sub>17</sub> O <sub>6</sub> ] <sup>+</sup> | HO                                            | 17        |
| 189.0905 | 1271.1  | 87.55    | [C <sub>12</sub> H <sub>13</sub> O <sub>2</sub> ] <sup>+</sup> | C <sub>3</sub> H <sub>5</sub> O <sub>5</sub>  | 121       |
| 137.0584 | 980.77  | 67.55    | [C <sub>8</sub> H <sub>9</sub> O <sub>2</sub> ] <sup>+</sup>   | C <sub>7</sub> H <sub>9</sub> O <sub>5</sub>  | 173       |
| 175.0757 | 894.64  | 61.62    | [C <sub>11</sub> H <sub>11</sub> O <sub>2</sub> ] <sup>+</sup> | C <sub>4</sub> H <sub>7</sub> O <sub>5</sub>  | 135       |
| 201.0891 | 714.15  | 49.19    | [C <sub>13</sub> H <sub>13</sub> O <sub>2</sub> ] <sup>+</sup> | C <sub>2</sub> H <sub>5</sub> O <sub>5</sub>  | 109       |
| 263.091  | 706.78  | 48.68    | [C <sub>14</sub> H <sub>15</sub> O <sub>5</sub> ] <sup>+</sup> | CH <sub>3</sub> O <sub>2</sub>                | 47        |
| 205.083  | 676.38  | 46.58    | [C <sub>12</sub> H <sub>13</sub> O <sub>3</sub> ] <sup>+</sup> | C <sub>3</sub> H <sub>5</sub> O <sub>4</sub>  | 105       |
| 247.0955 | 637.92  | 43.94    | [C <sub>14</sub> H <sub>15</sub> O <sub>4</sub> ] <sup>+</sup> | CH <sub>3</sub> O <sub>3</sub>                | 63        |
| 265.1053 | 633.19  | 43.61    | [C <sub>14</sub> H <sub>17</sub> O <sub>5</sub> ] <sup>+</sup> | CHO <sub>2</sub>                              | 45        |
| 221.0772 | 579.56  | 39.92    | [C <sub>12</sub> H <sub>13</sub> O <sub>4</sub> ] <sup>+</sup> | C <sub>3</sub> H <sub>5</sub> O <sub>3</sub>  | 89        |
| 109.0646 | 471.7   | 32.49    | [C <sub>7</sub> H <sub>9</sub> O] <sup>+</sup>                 | C <sub>8</sub> H <sub>9</sub> O <sub>6</sub>  | 201       |
| 173.0961 | 466.83  | 32.15    | [C <sub>12</sub> H <sub>13</sub> O] <sup>+</sup>               | C <sub>3</sub> H <sub>5</sub> O <sub>6</sub>  | 137       |
| 233.079  | 454.76  | 31.32    | [C <sub>13</sub> H <sub>13</sub> O <sub>4</sub> ] <sup>+</sup> | C <sub>2</sub> H <sub>5</sub> O <sub>3</sub>  | 77        |
| 111.044  | 426.03  | 29.34    | [C <sub>6</sub> H <sub>7</sub> O <sub>2</sub> ] <sup>+</sup>   | C <sub>9</sub> H <sub>11</sub> O <sub>5</sub> | 199.1     |
| 294.1056 | 418.05  | 28.79    | [C <sub>15</sub> H <sub>17</sub> O <sub>6</sub> ] <sup>+</sup> | HO                                            | 17        |
| 218.0888 | 374.12  | 25.77    | [C <sub>13</sub> H <sub>13</sub> O <sub>3</sub> ] <sup>+</sup> | C <sub>2</sub> H <sub>5</sub> O <sub>4</sub>  | 93        |
| 190.0958 | 364.13  | 25.08    | [C <sub>12</sub> H <sub>14</sub> O <sub>2</sub> ] <sup>+</sup> | C <sub>3</sub> H <sub>4</sub> O <sub>5</sub>  | 120       |
| 275.0882 | 348.91  | 24.03    | [C <sub>15</sub> H <sub>15</sub> O <sub>5</sub> ] <sup>+</sup> | H <sub>3</sub> O <sub>2</sub>                 | 35        |
| 229.0852 | 336.11  | 23.15    | [C <sub>14</sub> H <sub>13</sub> O <sub>3</sub> ] <sup>+</sup> | CH <sub>5</sub> O <sub>4</sub>                | 81        |
| 191.0691 | 333.45  | 22.97    | [C <sub>11</sub> H <sub>11</sub> O <sub>3</sub> ] <sup>+</sup> | C <sub>4</sub> H <sub>7</sub> O <sub>4</sub>  | 119       |
| 215.0713 | 328.14  | 22.6     | [C <sub>13</sub> H <sub>11</sub> O <sub>3</sub> ] <sup>+</sup> | C <sub>2</sub> H <sub>7</sub> O <sub>4</sub>  | 95        |
| 121.0645 | 324.19  | 22.33    | [C <sub>8</sub> H <sub>9</sub> O] <sup>+</sup>                 | C <sub>7</sub> H <sub>9</sub> O <sub>6</sub>  | 189       |
| 219.0992 | 294.29  | 20.27    | [C <sub>13</sub> H <sub>15</sub> O <sub>3</sub> ] <sup>+</sup> | C <sub>2</sub> H <sub>3</sub> O <sub>4</sub>  | 91        |
| 159.0798 | 290.12  | 19.98    | [C <sub>11</sub> H <sub>11</sub> O] <sup>+</sup>               | C <sub>4</sub> H <sub>7</sub> O <sub>6</sub>  | 151       |
| 278.1106 | 266.62  | 18.36    | [C <sub>15</sub> H <sub>18</sub> O <sub>5</sub> ] <sup>+</sup> | O <sub>2</sub>                                | 32        |
| 171.0809 | 253.7   | 17.47    | [C <sub>12</sub> H <sub>11</sub> O] <sup>+</sup>               | C <sub>3</sub> H <sub>7</sub> O <sub>6</sub>  | 139       |
| 193.0847 | 250.11  | 17.23    | [C <sub>11</sub> H <sub>13</sub> O <sub>3</sub> ] <sup>+</sup> | C <sub>4</sub> H <sub>5</sub> O <sub>4</sub>  | 117       |
| 191.1064 | 246.19  | 16.96    | [C <sub>12</sub> H <sub>15</sub> O <sub>2</sub> ] <sup>+</sup> | C <sub>3</sub> H <sub>3</sub> O <sub>5</sub>  | 119       |
| 235.096  | 244.4   | 16.83    | [C <sub>13</sub> H <sub>15</sub> O <sub>4</sub> ] <sup>+</sup> | C <sub>2</sub> H <sub>3</sub> O <sub>3</sub>  | 75        |
| 245.0786 | 232.15  | 15.99    | [C <sub>14</sub> H <sub>13</sub> O <sub>4</sub> ] <sup>+</sup> | CH <sub>5</sub> O <sub>3</sub>                | 65        |
| 161.0945 | 193.42  | 13.32    | [C <sub>11</sub> H <sub>13</sub> O] <sup>+</sup>               | C <sub>4</sub> H <sub>5</sub> O <sub>6</sub>  | 149       |
| 195.065  | 175.18  | 12.07    | [C <sub>10</sub> H <sub>11</sub> O <sub>4</sub> ] <sup>+</sup> | C <sub>5</sub> H <sub>7</sub> O <sub>3</sub>  | 115       |
| 176.0782 | 170.27  | 11.73    | [C <sub>11</sub> H <sub>11</sub> O <sub>2</sub> ] <sup>+</sup> | C <sub>4</sub> H <sub>7</sub> O <sub>5</sub>  | 135       |
| 207.0982 | 162.88  | 11.22    | [C <sub>12</sub> H <sub>15</sub> O <sub>3</sub> ] <sup>+</sup> | C <sub>3</sub> H <sub>3</sub> O <sub>4</sub>  | 103       |
| 264.098  | 162.6   | 11.2     | [C <sub>14</sub> H <sub>15</sub> O <sub>5</sub> ] <sup>+</sup> | CH <sub>3</sub> O <sub>2</sub>                | 47        |
| 145.1012 | 146.85  | 10.11    | [C <sub>11</sub> H <sub>13</sub> ] <sup>+</sup>                | C <sub>4</sub> H <sub>5</sub> O <sub>7</sub>  | 165       |
| 203.1047 | 136.9   | 9.43     | [C <sub>13</sub> H <sub>15</sub> O <sub>2</sub> ] <sup>+</sup> | C <sub>2</sub> H <sub>3</sub> O <sub>5</sub>  | 107       |
| 277.1048 | 135.28  | 9.32     | [C <sub>15</sub> H <sub>17</sub> O <sub>5</sub> ] <sup>+</sup> | HO <sub>2</sub>                               | 33        |
| 223.0941 | 133.82  | 9.22     | [C <sub>12</sub> H <sub>15</sub> O <sub>4</sub> ] <sup>+</sup> | C <sub>3</sub> H <sub>3</sub> O <sub>3</sub>  | 87        |
| 222.0823 | 121.97  | 8.4      | [C <sub>12</sub> H <sub>13</sub> O <sub>4</sub> ] <sup>+</sup> | C <sub>3</sub> H <sub>5</sub> O <sub>3</sub>  | 89        |
| 248.1011 | 121.61  | 8.38     | [C <sub>14</sub> H <sub>15</sub> O <sub>4</sub> ] <sup>+</sup> | CH <sub>3</sub> O <sub>3</sub>                | 63        |

|          |        |      |                                                                |                                               |       |
|----------|--------|------|----------------------------------------------------------------|-----------------------------------------------|-------|
| 187.0764 | 121.52 | 8.37 | [C <sub>12</sub> H <sub>11</sub> O <sub>2</sub> ] <sup>+</sup> | C <sub>3</sub> H <sub>7</sub> O <sub>5</sub>  | 123   |
| 237.1129 | 114.62 | 7.89 | [C <sub>13</sub> H <sub>17</sub> O <sub>4</sub> ] <sup>+</sup> | C <sub>2</sub> HO <sub>3</sub>                | 73    |
| 153.0571 | 105    | 7.23 | [C <sub>8</sub> H <sub>9</sub> O <sub>3</sub> ] <sup>+</sup>   | C <sub>7</sub> H <sub>9</sub> O <sub>4</sub>  | 157.1 |
| 199.0739 | 104.5  | 7.2  | [C <sub>13</sub> H <sub>11</sub> O <sub>2</sub> ] <sup>+</sup> | C <sub>2</sub> H <sub>7</sub> O <sub>5</sub>  | 111   |
| 163.0764 | 101.62 | 7    | [C <sub>10</sub> H <sub>11</sub> O <sub>2</sub> ] <sup>+</sup> | C <sub>5</sub> H <sub>7</sub> O <sub>5</sub>  | 147   |
| 128.0644 | 98.38  | 6.78 | [C <sub>10</sub> H <sub>8</sub> ] <sup>+</sup>                 | C <sub>5</sub> H <sub>10</sub> O <sub>7</sub> | 182   |
| 189.1246 | 98.04  | 6.75 | [C <sub>13</sub> H <sub>17</sub> O] <sup>+</sup>               | C <sub>2</sub> HO <sub>6</sub>                | 121   |
| 123.0458 | 96.36  | 6.64 | [C <sub>7</sub> H <sub>7</sub> O <sub>2</sub> ] <sup>+</sup>   | C <sub>8</sub> H <sub>11</sub> O <sub>5</sub> | 187.1 |
| 175.1119 | 94.56  | 6.51 | [C <sub>12</sub> H <sub>15</sub> O] <sup>+</sup>               | C <sub>3</sub> H <sub>3</sub> O <sub>6</sub>  | 135   |
| 171.1046 | 88.97  | 6.13 | [C <sub>9</sub> H <sub>15</sub> O <sub>3</sub> ] <sup>+</sup>  | C <sub>6</sub> H <sub>3</sub> O <sub>4</sub>  | 139   |
| 232.1073 | 89.01  | 6.13 | [C <sub>14</sub> H <sub>16</sub> O <sub>3</sub> ] <sup>+</sup> | CH <sub>2</sub> O <sub>4</sub>                | 78    |
| 145.0638 | 88.62  | 6.1  | [C <sub>10</sub> H <sub>9</sub> O] <sup>+</sup>                | C <sub>5</sub> H <sub>9</sub> O <sub>6</sub>  | 165   |
| 110.0701 | 86.45  | 5.95 | [C <sub>7</sub> H <sub>10</sub> O] <sup>+</sup>                | C <sub>8</sub> H <sub>8</sub> O <sub>6</sub>  | 200   |
| 157.051  | 83.11  | 5.72 | [C <sub>7</sub> H <sub>9</sub> O <sub>4</sub> ] <sup>+</sup>   | C <sub>8</sub> H <sub>9</sub> O <sub>3</sub>  | 153.1 |
| 234.0828 | 81.96  | 5.65 | [C <sub>13</sub> H <sub>13</sub> O <sub>4</sub> ] <sup>+</sup> | C <sub>2</sub> H <sub>5</sub> O <sub>3</sub>  | 77    |
| 186.1029 | 81.22  | 5.59 | [C <sub>13</sub> H <sub>14</sub> O] <sup>+</sup>               | C <sub>2</sub> H <sub>4</sub> O <sub>6</sub>  | 124   |

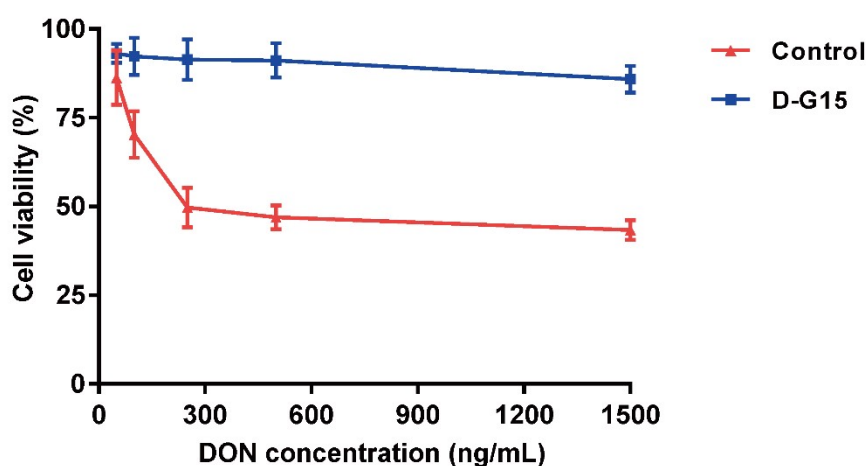

**Fig. S3.** Effects of DON and D-G15 degradation products on HEK 293T cell viability. The concentration represents the initial concentration of DON before D-G15 incubation. Error bars indicate standard deviation.

**Table S6. D-G15 candidate enzyme primers sequence**

| Candidate | Primers (5'-3')                                 |
|-----------|-------------------------------------------------|
| No. 1-F   | CTGGTGCCGCGCGGCAGCCATATGATGGAATACCGCAAGCTCGG    |
| No. 1-R   | TTTGTTAGCAGCCGGATCCTCGAGCTACCGCCGCCTTCCAT       |
| No. 2-F   | GGATATCGGAATTAATTCGGATCCCATGAGATTTGAGTGTGGC     |
| No. 2-R   | GTGGTGGTGGTGGTGGTGAAGCTTCTTGGAAGCGACAGTGGC      |
| No. 3-F   | CTGGTGCCGCGCGGCAGCCATATGATGCGCTACAAGCTTCTCGG    |
| No. 3-R   | TTTGTTAGCAGCCGGATCCTCGAGCTATTGCGCCGCGGGAG       |
| No. 4-F   | CTGGTGCCGCGCGGCAGCCATATGATGGAATACCGGCTGCTC      |
| No. 4-R   | TTTGTTAGCAGCCGGATCCTCGAGTTAGTGCTCCAGATGTGGGG    |
| No. 5-F   | CTGGTGCCGCGCGGCAGCCATATGATGACCTACCGTGCCCATTC    |
| No. 5-R   | TTTGTTAGCAGCCGGATCCTCGAGTCAGCGCTTGAGCGGGTA      |
| No. 6-F   | CTGGTGCCGCGCGGCAGCCATATGATGGAATACCGTCGTCTCGG    |
| No. 6-R   | TTTGTTAGCAGCCGGATCCTCGAGTCAATACCGCAGCGGGCC      |
| No. 7-F   | CTGGTGCCGCGCGGCAGCCATATGATGGTTGACTACCGTTACCTGGG |
| No. 7-R   | TTTGTTAGCAGCCGGATCCTCGAGTCAGGCGACGGCGCGGAC      |
| No. 8-F   | GGATATCGGAATTAATTCGGATCCCATGACTTCGCGTCTCACCGC   |
| No. 8-R   | GTGGTGGTGGTGGTGGTGAAGCTTGTGCTGGCGGTCTTGGGC      |
| No. 9-F   | CTGGTGCCGCGCGGCAGCCATATGATGCCCGTGCCCGATGCA      |
| No. 9-R   | TTTGTTAGCAGCCGGATCCTCGAGCTAGGCCGCATCGAGGACGG    |
| No. 10-F  | CTGGTGCCGCGCGGCAGCCATATGATGAAATATGTGAATTTGGGC   |
| No. 10-R  | TTTGTTAGCAGCCGGATCCTCGAGTTAGTGGTTGAGGGAGGC      |
| No. 11-F  | CTGGTGCCGCGCGGCAGCCATATGATGCTCGCCGAGCACGGC      |
| No. 11-R  | TTTGTTAGCAGCCGGATCCTCGAGCTAGCAAGGCAAGCCGGCGA    |

**Table S7. Homology between the candidate enzyme and the reported DON dehydrogenase**

| Candidate | Identity (%) |       |       |       |         |
|-----------|--------------|-------|-------|-------|---------|
|           | DepA         | QDDH  | DDH   | SDH   | AKR18A1 |
| No. 2     | 86.08        | 85.57 | 56.64 | 58.20 | /       |
| No. 3     | /            | /     | /     | /     | 58.08   |
| No. 8     | 36.68        | 36.68 | 36.47 | 33.93 | /       |

" / " represents that no significant similarity was found.

**Table S8. Homology of candidate DON isomerases with reported DON isomerases**

| Candidate | Identity (%) |        |         |
|-----------|--------------|--------|---------|
|           | DepB         | AKR6D1 | AKR13B2 |
| No. 1     | 84.55        | 38.63  | 28.81   |
| No. 4     | 43.71        | 35.14  | 30.12   |
| No. 5     | 33.23        | 34.26  | 25.58   |
| No. 6     | 37.07        | 92.10  | 24.83   |
| No. 7     | 38.07        | 35.15  | 28.43   |
| No. 9     | 29.02        | 26.09  | 78.09   |
| No. 10    | 30.51        | 30.65  | 34.23   |
| No. 11    | 24.76        | 24.12  | 36.53   |

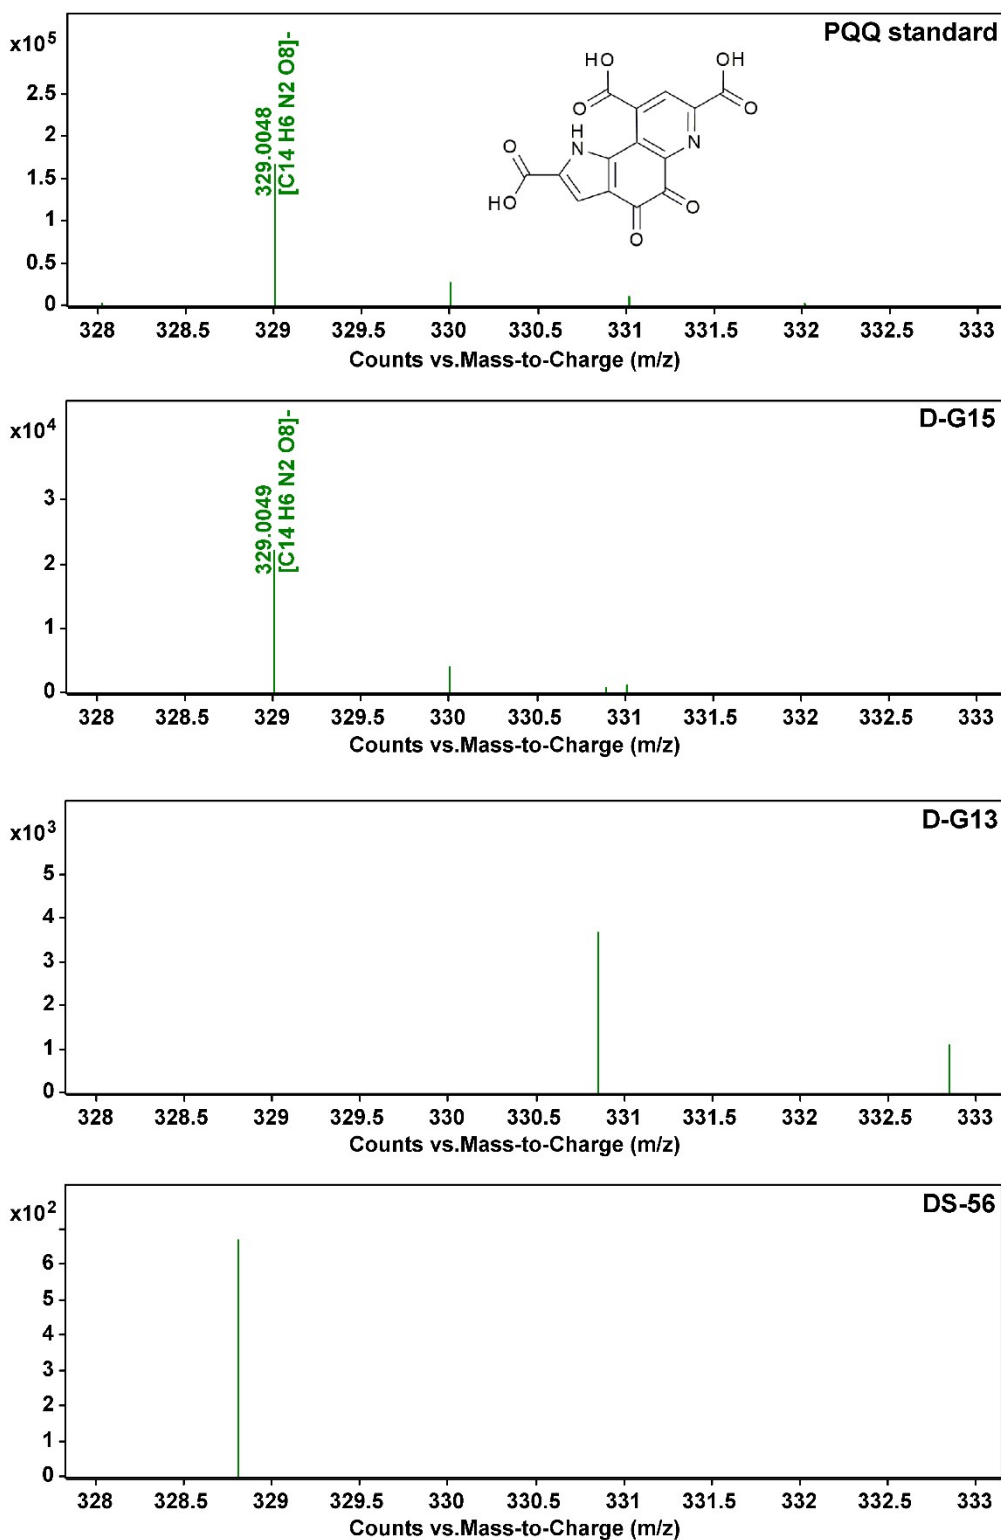

**Fig. S4.** The analysis of PQQ in D-G15, D-G13, and DS-56 media by LC-MS.

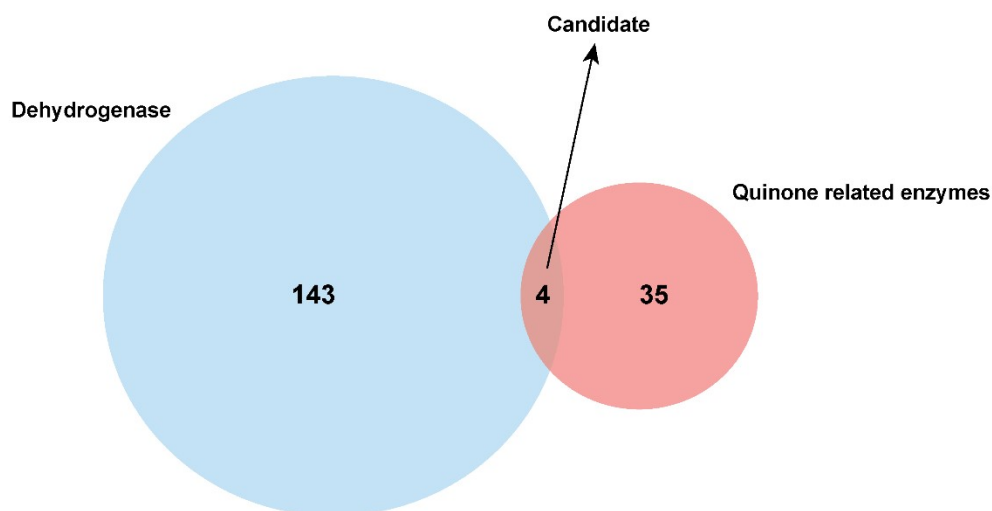

**Fig. S5.** Analyzing candidate enzymes for DON degradation in D-G13.

**Table S9. D-G13 candidate enzyme primers sequence**

| Candidate | Primers (5'-3')                                  |                                                   |
|-----------|--------------------------------------------------|---------------------------------------------------|
| No. 1-F   | TCGGAATTAATTCGGATCCCATGACAAAGCAGACTATCTCTCGTGCG  | <b>Tab<br/>le<br/>S10.<br/>Ho<br/>mol<br/>ogy</b> |
| No. 1-R   | TGGTGGTGGTGGTGAAGCTTGAGCCCGAAGACCACGACCTG        |                                                   |
| No. 2-F   | TCGGAATTAATTCGGATCCCGTGCCCACTTTAGACCTGATTGACGATC |                                                   |
| No. 2-R   | TGGTGGTGGTGGTGAAGCTTCTAGTGGGCGTGGCCGTG           |                                                   |
| No. 3-F   | TGCCGCGCGGCAGCCATATGGCCGACGTGACCGCCGCG           |                                                   |
| No. 3-R   | TTAGCAGCCGGATCCTCGAGGAGCGCGAACACGTAGAGCACGTTGGC  |                                                   |
| No. 4-F   | TCGGAATTAATTCGGATCCCATGATCTTCTCGCGCCTCTCGCC      |                                                   |
| No. 4-R   | TGGTGGTGGTGGTGAAGCTTCTAGAGCGACGCCTTCCCGC         |                                                   |

**between D-G13 candidate gene and reported DON dehydrogenase**

| Candidate | Identity (%) |       |       |       |         |
|-----------|--------------|-------|-------|-------|---------|
|           | DepA         | QDDH  | DDH   | SDH   | G15-DDH |
| No. 1     | 26.91        | 26.91 | 27.47 | 28.48 | 29.05   |
| No. 2     | /            | /     | /     | /     | /       |
| No. 3     | 28.20        | 28.20 | 26.27 | 27.18 | 27.75   |
| No. 4     | /            | /     | /     | /     | /       |

"/" represents that no significant similarity was found.
